# Supplementary material for: Strategies for improved rhamnolipid production by Pseudomonas aeruginosa PA1
Source: PeerJ. 2016 May 24;4:e2078. doi: 10.7717/peerj.2078 (PMC4888285; doi:10.7717/peerj.2078)
Supplement: Data S1 [file peerj-04-2078-s001.xls]

## Sheet: Fed-Batch
				Fed Batch Experiment
Biomass g/L								Rhamnose g/L					Rhamnolipids g/L
Time (hours)	C+N	C	H2O				Time (hours)	C+N	C	H2O		Time (hours)	C+N	C	H2O
0	2.36	2.39	2.41				0	0.077	0.087	0.097		0	0.17171	0.19401	0.21631
27	4.55	4.6	4.55				27	0.361	0.527	0.481		27	0.80503	1.17521	1.07263
47	5.29	5.24	5.22				47	0.944	1.009	1.074		47	2.10512	2.25007	2.39502
71	5.37	5.05	4.87				51	0.809	1.035	0.798		51	1.80407	2.30805	1.77954
95.5	6.84	5.71	4.92				71	1.355	1.229	1.355		71	3.02165	2.74067	3.02165
123	7.75308	6.79317	4.79952				95.5	1.909	2.198	1.293		95.5	4.25707	4.90154	2.88339
143	7.99921	6.76856	4.52878				97.5	1.865	2.2	1.293		97.5	4.15895	4.906	2.88339
168	7.75308	6.39936	4.30726				124	2.461	2.486	1.367		124	5.48803	5.54378	3.04841
219.5	7.0393	5.95633	3.93807				124.5	2.5	2.5	1.35		124.5	5.575	5.575	3.0105
238.5	7.13775	5.73482	3.56888				143	2.909	2.481	1.402		143	6.48707	5.53263	3.12646
Tf - To	4.77775	3.34482	1.15888				168	3.406	2.327	1.233		168	7.59538	5.18921	2.74959
							195	4.63	3.23	1.27		195	10.3249	7.2029	2.8321
							219.5	4.57	3.41	1.32		219.5	10.1911	7.6043	2.9436
							238.5	4.98	3.57	1.19		238.5	11.1054	7.9611	2.6537
							Tf - To	4.903	3.483	1.093		Tf - To	10.9337	7.76709	2.43739
	Glycerol g/L							NO3 g/L					Yp/s (rhamnolipid/glycerol)
Time (hours)	C+N	C	H2O				Time (hours)	C+N	C	H2O			C+N	C	H2O
0	9.652	11.08	11.979				0	0.53	0.52	0.5			0.325001	0.354015	0.209957
27	4.315	5.445	4.46				27	-0.0044	-0.0066	0
47	0.47	0.95	1.7				47	0.001	-0.0022	-0.0045
51	10.24	10.21	0.99				51	0.51	0.0011	0.0033
71	5.95	8.32	0.0052				71	0.0011	0.0077	0.0011				Qp (g.l-1.h-1)
95.5	1.53	6.93	0				95.5	0.0066	0.0077	0.0033			C+N	C	H2O
97.5	11.48	6.86	0.14				97.5	0.52	0	0			0.0465635	0.0333799	0.026537
124	7.4	4.56	0				124	0	0	0
124.5	7.3	4.5	0				124.5	0	0	0
143	3.8	2.78	0				143	0.48	0	0
168	0.04	0.53	0				168	0.12	0	0
195	9.9	12.4	0				195	0.58	0	0
219.5	8.58	11.1	0.41				219.5	0.254	0	0
238.5	5.59	10.27	0.37				238.5	0.249	0	0
consumed glycerol	33.642	21.94	11.609

## Sheet: Autoinducers
					Experiment of suplementation with P. aeruginosa spent culture medium
			Rhamnose g/L								Biomassa g/L
	Time (hours)	0	0.01	0.05	0.1	0.15	0.2		Time (hours)	0	0.01	0.05	0.1	0.15	0.2
	0	0.181	0.282	0.344	0.489	0.503	0.532		0	0.68	0.55	0.58	0.62	0.68	0.62
	27.58	0.39	0.42	0.576	0.764	0.789	0.941		27.58	4.06	4.08	4.31	4.55	4.62	4.8
	51.58	0.552	0.606	1.065	1.38	1.766	1.63		51.58	4.97	5.29	6.13	6.4	6.54	6.52
	75.33	0.925	1	1.62	1.69	2.08	1.92		75.33	5.73	6.37	6.76	7.21	7.11	7.45
	98.83	1.1	1.52	1.96	2.17	2.44	2.62		98.83	6.13	6.62	7.03	7.67	7.53	7.77
	122.83	1.84	1.58	2.47	3.12	3.49	3.41		122.83	6.13	6.71	7.38	7.94	8.02	7.87
	146.5	1.706	1.68	3.34	3.46	4.04	3.9		146.5	6.2	6.61	7.26	7.7	7.77	7.48
	194.83	2.33	2.3	3.86	4.12	4.46	4.74		194.83	5.66	5.86	6.54	6.15	6.08	6.3
			Glycerol g/L									Yp/x (rhamnose/biomass)
	Time	0	0.01	0.05	0.1	0.15	0.2		Time (hours)	0	0.01	0.05	0.1	0.15	0.2
	0	20.22	24.96	25.03	24.96	24.18	24.61		27.58	0.0618343	0.0390935	0.0621984	0.0699746	0.0725888	0.0978469
	51.58	20.5	18.1	16.62	16.26	17.25	14.07		51.58	0.0864802	0.0683544	0.12991	0.154152	0.215529	0.186102
	98.83	13.44	17.33	8.84	7.42	10.96	8.84		75.33	0.147327	0.123368	0.206472	0.182246	0.245257	0.203221
	146.5	13.08	16.48	5.66	1.06	1.77	0		98.83	0.168624	0.203954	0.250543	0.23844	0.282774	0.292028
	194.8	9.19	11.46	0.21	0	0	0		122.83	0.304404	0.210714	0.312647	0.359426	0.406948	0.396966
	Gly(start)-Gly(end)	11.03	13.5	24.82	24.96	24.18	24.61		146.5	0.276268	0.230693	0.448503	0.419633	0.498872	0.490962
									194.83	0.431526	0.380038	0.589933	0.6566	0.732778	0.740845
			Rhamnolipids g/L									Yp/x (rhamnolipid/biomass)
	Time (hours)	0	0.01	0.05	0.1	0.15	0.2		Time (hours)	0	0.01	0.05	0.1	0.15	0.2
	0	0.40363	0.62886	0.76712	1.09047	1.12169	1.18636		27.58	0.137891	0.0871785	0.138702	0.156043	0.161873	0.218199
	27.58	0.8697	0.9366	1.28448	1.70372	1.75947	2.09843		51.58	0.192851	0.15243	0.289699	0.34376	0.48063	0.415007
	51.58	1.23096	1.35138	2.37495	3.0774	3.93818	3.6349		75.33	0.328539	0.27511	0.460434	0.406408	0.546922	0.453183
	75.33	2.06275	2.23	3.6126	3.7687	4.6384	4.2816		98.83	0.376031	0.454817	0.55871	0.531721	0.630585	0.651222
	98.83	2.453	3.3896	4.3708	4.8391	5.4412	5.8426		122.83	0.67882	0.469893	0.697203	0.80152	0.907495	0.885233
	122.83	4.1032	3.5234	5.5081	6.9576	7.7827	7.6043		146.5	0.616078	0.514446	1.00016	0.935781	1.11248	1.09485
	146.5	3.80438	3.7464	7.4482	7.7158	9.0092	8.697		194.83	0.962303	0.847484	1.31555	1.46422	1.63409	1.65208
	194.83	5.1959	5.129	8.6078	9.1876	9.9458	10.5702
											Yp/s (rhamnolipids/glycerol)
									195	0.434476	0.333344	0.315902	0.324404	0.364934	0.381302
			Qp (g.L-1.h-1)
		0.0266456	0.0263026	0.0441426	0.0471159	0.0510041	0.0542062

## Sheet: pH
Variation of rhamnolipid synthesis as a function of the pH of the culture medium.
	Relative rhamnolipids concentration
pH	Exp. 1	Exp. 2	average
5.66	18.5279		18.5279
6		77.33	77.33
6.26	89.3401	89.56	89.4501
6.66	96.4467		96.4467
7	100	100	100
7.3	84.264	91	87.632
7.7	75.1269	88.49	81.8085
7.83	69.797		69.797
8		56.11	56.11
